# Supplementary material
Source: MDPI journal article supplement (https://www.mdpi.com/2312-7481/10/2/9)
Supplement: s1 [file s1 › magnetochemistry-2801415-supplementary.pdf]

# Low-Frequency Dynamic Magnetic Fields Decrease Cellular Uptake of Magnetic Nanoparticles

Anna V. Ivanova <sup>1,†</sup>, Nelly S. Chmelyuk <sup>1,†</sup>, Aleksey A. Nikitin <sup>1,2</sup>, Alexander G. Majouga <sup>3</sup>, Vladimir P. Chekhonin <sup>1,4</sup> and Maxim A. Abakumov <sup>1,\*</sup>

<sup>1</sup> Department of Medical Nanobiotechnology, N.I. Pirogov Russian National Research Medical University, 117997 Moscow, Russia; super.fosforit@yandex.ru (A.V.I.); nellichmelyuk@yandex.ru (N.S.C.); nikitin.aa93@mail.ru (A.A.N.); chekhoninnew@yandex.ru (V.P.C.)  
<sup>2</sup> Department of General and Inorganic Chemistry, Mendeleev University of Chemical Technology of Russia, 125047 Moscow, Russia  
<sup>3</sup> Laboratory of Biomedical Nanomaterials, National University of Science and Technology (MISIS), 119049 Moscow, Russia; alexander.majouga@gmail.com  
<sup>4</sup> Department of Basic and Applied Neurobiology, Serbsky National Medical Research Center for Psychiatry and Narcology, 119991 Moscow, Russia  
\* Correspondence: abakumov1988@gmail.com; Tel.: +7-9035864777  
† These authors contributed equally to this work.

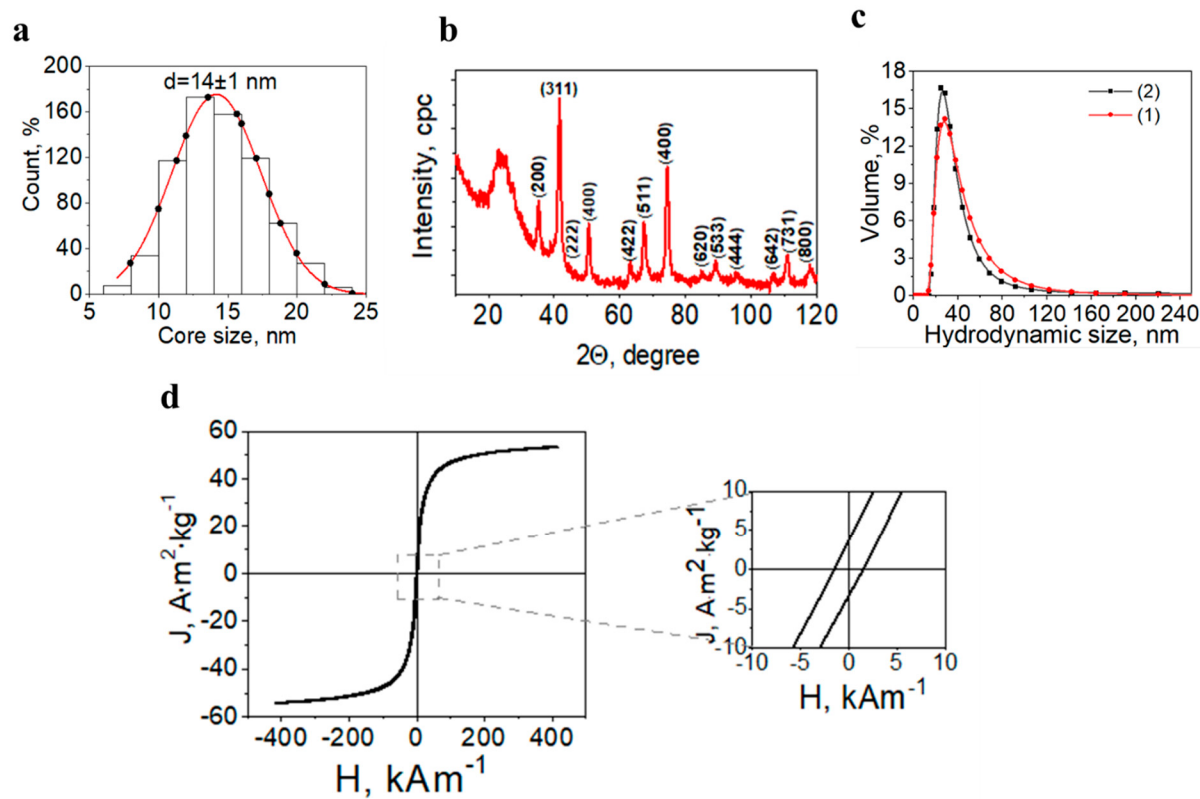

**Figure S1.** (a) Histogram of MNPs core size distribution. (b) XRD pattern of  $\text{Fe}_3\text{O}_4$ @OA MNPs powder with Miller indices of the Bragg peaks in an inverse spinel structure (cps, counts per second). (c) Hydrodynamic diameter of  $\text{Fe}_3\text{O}_4$ -DOPAC-PEG-Cy5 and  $\text{Fe}_3\text{O}_4$ -DOPAC-HSA-PEG-Cy5 in PBS at pH=7.4. (d) Hysteresis loop of MNP at  $T=300$  K. The specific magnetization was calculated using the  $\text{Fe}_3\text{O}_4$  mass and the Fe content determined by the thermogravimetric analysis and AES analysis.

**Table S1.** The hydrodynamic parameters of MNPs.

|  | Hydrodynamic size, nm | Polydispersity | Solvents |
|--|-----------------------|----------------|----------|
|--|-----------------------|----------------|----------|

|                                                   | Volume | Intensity | Index |                   |
|---------------------------------------------------|--------|-----------|-------|-------------------|
| Fe <sub>3</sub> O <sub>4</sub> -OA                | 20±1   | 24±2      | 0,059 | Hexane            |
| Fe <sub>3</sub> O <sub>4</sub> -DOPAC             | 25±1   | 30±1      | 0,279 | dH <sub>2</sub> O |
| Fe <sub>3</sub> O <sub>4</sub> -DOPAC-PEG         | 37±1   | 46±2      | 0,283 | PBS               |
| Fe <sub>3</sub> O <sub>4</sub> -DOPAC-HSA         | 40±1   | 43±2      | 0,268 | PBS               |
| Fe <sub>3</sub> O <sub>4</sub> -DOPAC-HSA-PEG     | 37±3   | 63±1      | 0,250 | PBS               |
| Fe <sub>3</sub> O <sub>4</sub> -DOPAC-HSA-PEG-Cy5 | 38±2   | 48±2      | 0,246 | PBS               |
| Fe <sub>3</sub> O <sub>4</sub> -DOPAC-PEG-Cy5     | 39±1   | 44±3      | 0,389 | PBS               |

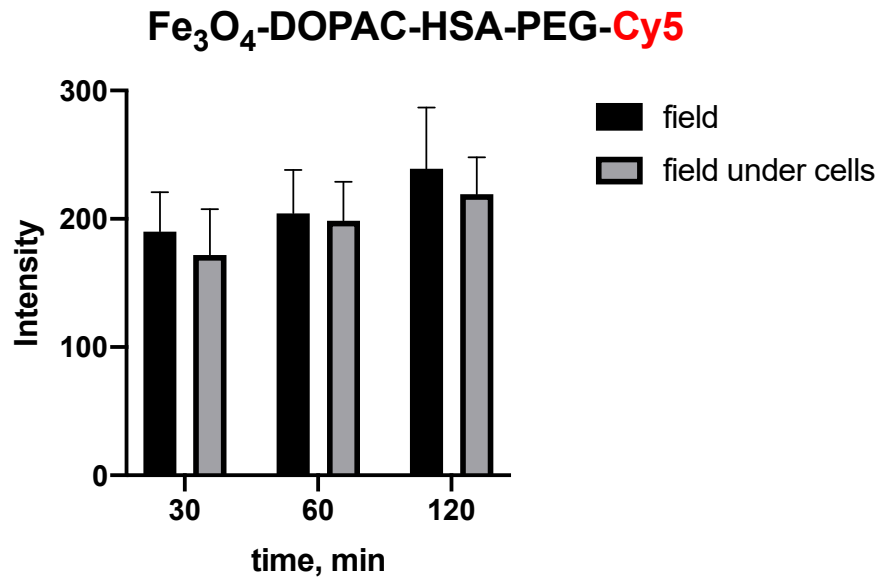

**Figure S2.** (a) Average intensity values of confocal images of SH-SY5Y cells areas in various incubation time with Fe<sub>3</sub>O<sub>4</sub>-DOPAC-HSA-PEG-Cy5 when magnetic field was applied from the top of the cells or under the cells, [Fe] = 100 ug/mL. \*—*t*-test, significantly different ( $p < 0.05$ ).

For cytotoxicity assay  $10 \times 10^3$  SH-SY5Y cells and  $15 \times 10^3$  RAW 264.7 cells were seeded in 100uL growth medium in 96 cell well. 24 h after incubation at 37 °C, 5 % CO<sub>2</sub>, MNPs were added to the cells in various concentrations. After 48 h incubation, the cells were washed with PBS, and a fresh growth medium with MTS-reagent was added (100 ul of growth medium and 20 ul of MTS-reagent in each well). Cells without MNPs were used as a control. The cells were incubated with MTS-reagent for 4 h at 37 °C and 5 % CO<sub>2</sub> in the humid atmosphere. The test was done in six replicates. Statistical analysis using "Unpaired t test" was performed using GraphPad Prism 9.0. Optical density was measured with a Multiscan GO plate reader (Thermo Scientific),  $\lambda = 490$  nm. Cell viability was calculated as:

$$\text{Cell viability(\%)} = \frac{(A_s - A_b)}{(A_c - A_b)} \times 100, \text{ where} \quad (1)$$

$A_s$  – mean optical density in sample wells,  
 $A_b$  – mean optical density in blank wells,  
 $A_c$  – mean optical density in control wells.

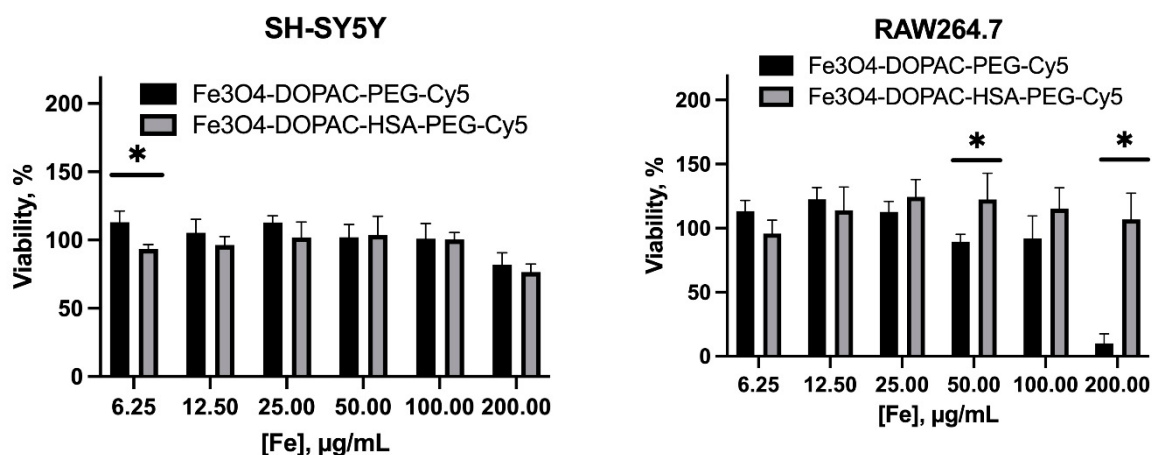

**Figure S3.** Cytotoxicity assays of RAW264.7 and SH-SY5Y cells, which were incubated with Fe<sub>3</sub>O<sub>4</sub>-DOPAC-PEG-Cy5 and Fe<sub>3</sub>O<sub>4</sub>-DOPAC-HSA-PEG-Cy5 MNPs for 48 h. \*—*t*-test, significantly different ( $P < 0.05$ ).

Prussian Blue staining.

SH-SY5Y and RAW264.7 cells were seeded confocal petri dish 35 mm ( $3 \times 10^5$  cells/well) and incubated for 24 hours without treatment at 37 C and 5 % CO<sub>2</sub>. Then the growth medium was replaced and supplemented with MNPs MNPs@DOPAC@PEG@Cy5 or MNPs@DOPAC@HSA@PEG@Cy5 with iron concentration [Fe] = 100  $\mu\text{g/mL}$  and incubated for 2 h. Then cells were washed twice by DPBS and fixed by 4 % paraformaldehyde for 15 min at 4 C. Then, cells were washed by PBS and stained by iron stain kit (HT20-1KT, Sigma) following the manufacturing protocol. The images were obtained using a Nikon Ti2 microscope with 60X 1,25 objective lenses.

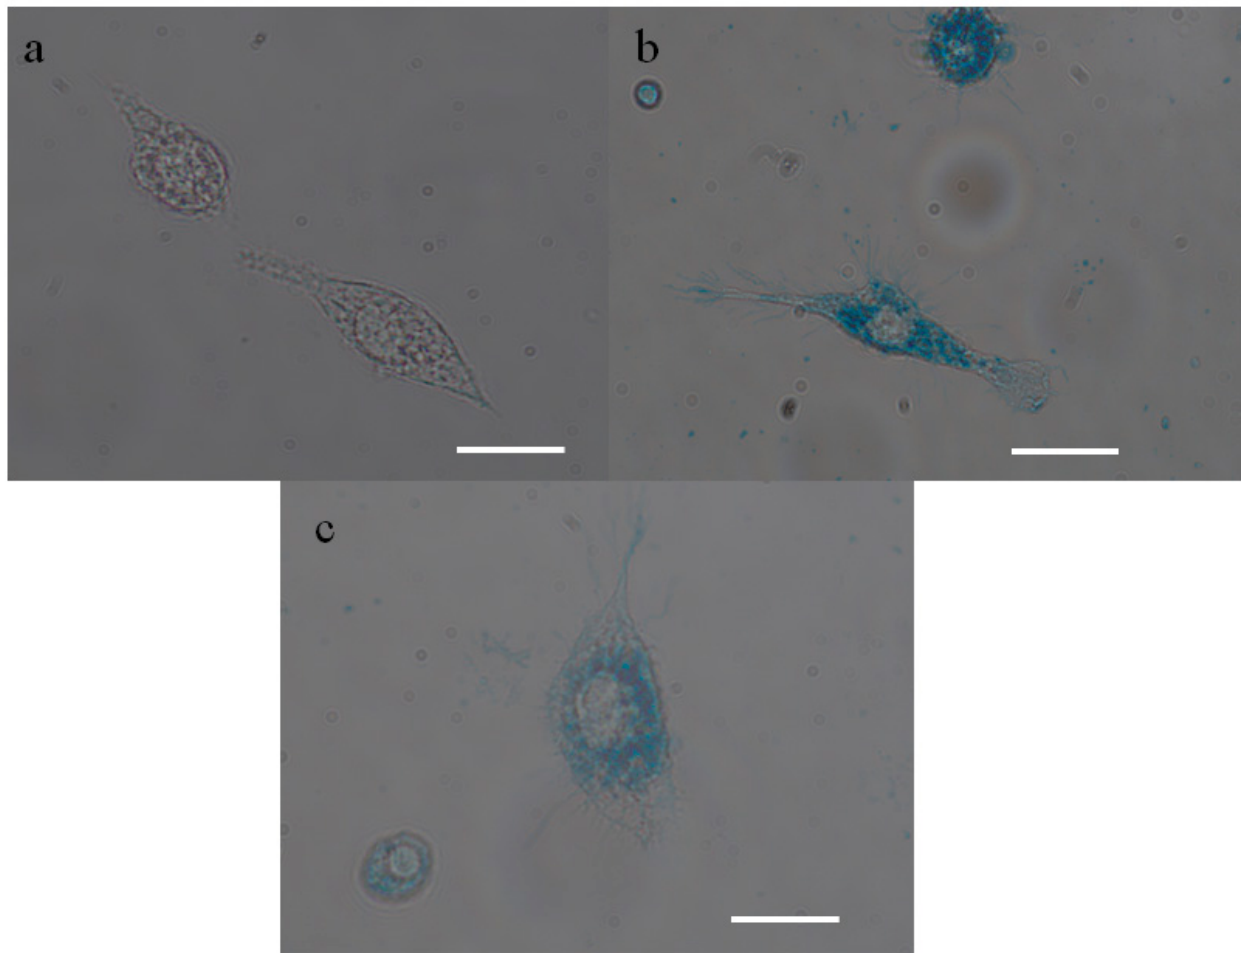

**Figure S4.** Prussian Blue staining of RAW264.7 cells. a – RAW264.7 cells non treated with MNPS, b - RAW264.7 cells treated with Fe<sub>3</sub>O<sub>4</sub>-DOPAC-HSA-PEG-Cy5, c - RAW264.7 cells treated with Fe<sub>3</sub>O<sub>4</sub>-DOPAC-PEG-Cy5. Blue color corresponds to signal MNPs. Scale bar - 10  $\mu$ m.

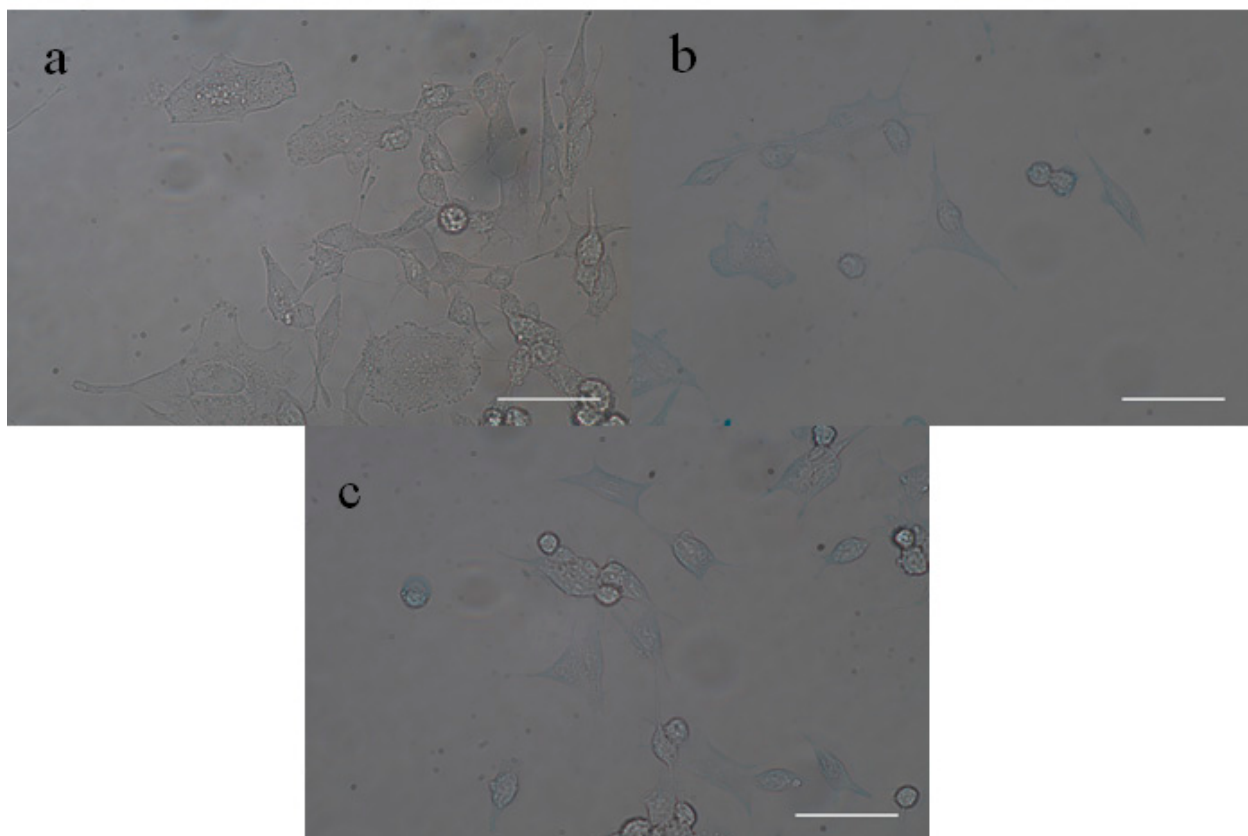

**Figure S5.** Prussian Blue staining of SH-SY5Y cells. a – SH-SY5Y cells non treated with MNPS, b - SH-SY5Y cells treated with Fe<sub>3</sub>O<sub>4</sub>-DOPAC-HSA-PEG-Cy5, c - SH-SY5Y cells treated with Fe<sub>3</sub>O<sub>4</sub>-DOPAC-PEG-Cy5. Blue color corresponds to signal MNPs. Scale bar - 100 μm.
